# Supplementary material
Source: PubMed Central journal article supplement (PMC3330748)
Supplement: NIHMS30434-supplement-Supplementary_notes.pdf [file NIHMS30434-supplement-Supplementary_notes.pdf]

Section 1: Supplementary Notes for “Origins and functional impact of copy number variation in the human genome”

Donald F. Conrad<sup>1</sup>, Dalila Pinto<sup>2</sup>, Richard Redon<sup>1,3</sup>, Lars Feuk<sup>2,4</sup>, Omer Gokcumen<sup>5</sup>, Yujun Zhang<sup>1</sup>, Jan Aerts<sup>1</sup>, T. Daniel Andrews<sup>1</sup>, Chris Barnes<sup>1</sup>, Peter Campbell<sup>1</sup>, Tomas Fitzgerald<sup>1</sup>, Min Hu<sup>1</sup>, Chun Hwa Ihm<sup>5</sup>, Kati Kristiansson<sup>1</sup>, Daniel MacArthur<sup>1</sup>, Jeff MacDonald<sup>2</sup>, Ifejinelo Onyiah<sup>1</sup>, Andy Wing Chun Pang<sup>2</sup>, Sam Robson<sup>1</sup>, Armand Valsesia<sup>1</sup>, Klaudia Walter<sup>1</sup>, John Wei<sup>2</sup>, Wellcome Trust Case Control Consortium, Chris Tyler-Smith<sup>1</sup>, Nigel P. Carter<sup>1</sup>, Charles Lee<sup>5</sup>, Steve Scherer<sup>2,6</sup>, Matthew E. Hurles<sup>1</sup>

<sup>1</sup> Wellcome Trust Sanger Institute, Hinxton, Cambridge, UK

<sup>2</sup> The Centre for Applied Genomics and Program in Genetics and Genomic Biology, The Hospital for Sick Children, MaRS CentreEast Tower, 101 College Street, Room 14-701, Toronto, Ontario M5G 1L7, Canada.

<sup>3</sup> Inserm UMR915, L’institut du thorax, Nantes, France

<sup>4</sup> Department of Genetics and Pathology, Rudbeck Laboratory, Uppsala University, Uppsala, Sweden

<sup>5</sup> Department of Pathology, Brigham and Womens Hospital and Harvard Medical School, Boston, MA, USA

<sup>6</sup> Department of Molecular and Medical Genetics, Faculty of Medicine, University of Toronto M5S 1A8, Canada.

September 28, 2009

# Contents

|          |                                                                      |           |
|----------|----------------------------------------------------------------------|-----------|
| <b>1</b> | <b>CNV Genotyping</b>                                                | <b>3</b>  |
| 1.1      | Absolute copy number / Ancestral state assignment . . . . .          | 4         |
| <b>2</b> | <b>Genomic Impact</b>                                                | <b>5</b>  |
| 2.1      | Functional classification of genes intersected by CNV loci . . . . . | 7         |
| <b>3</b> | <b>Mutation Mechanisms</b>                                           | <b>10</b> |
| 3.1      | VNTRs . . . . .                                                      | 11        |
| 3.2      | Sequence Context . . . . .                                           | 15        |
| 3.3      | Dispersed Duplications . . . . .                                     | 18        |
| <b>4</b> | <b>Population Genetics Analyses</b>                                  | <b>23</b> |
| 4.1      | Selection analyses . . . . .                                         | 23        |
| 4.2      | LD analyses . . . . .                                                | 24        |
| <b>A</b> | <b>WTCCC Authors</b>                                                 | <b>25</b> |

## List of Figures

|      |                                                                                                         |    |
|------|---------------------------------------------------------------------------------------------------------|----|
| 1.1  | Observed cluster means for 3 component CNVs. . . . .                                                    | 5  |
| 1.2  | Testing of enrichment/impoverishment of genomic features within CNVs. . . . .                           | 6  |
| 1.3  | Over- or under-representation of Gene Ontology categories (GO) and KEGG pathways. . . . .               | 8  |
| 1.4  | Prevalence of mutation processes depend on size. . . . .                                                | 11 |
| 1.5  | Gels for PCR validation of VNTRs. . . . .                                                               | 13 |
| 1.5  | (Continued). Gels for PCR validation of VNTRs. . . . .                                                  | 14 |
| 1.6  | Functional sequences within validated CNVs. . . . .                                                     | 15 |
| 1.7  | Effect of GC and ascertainment on gene overlap analyses. . . . .                                        | 16 |
| 1.8  | Shannon Logos of 20 motifs identified by nestedMICA. . . . .                                            | 17 |
| 1.9  | Signal of polymorphic retroposition at the gene PRKRA from <i>in silico</i> splicing. . . . .           | 18 |
| 1.10 | PCR results for four dispersed duplications on HapMap samples. . . . .                                  | 22 |
| 1.11 | Population differentiation as a function of mutation mechanism. . . . .                                 | 23 |
| 1.12 | Distribution of squared Pearson correlation between CNV intensities and GWAS hit SNP genotypes. . . . . | 24 |

## List of Tables

|     |                                                                                                                   |    |
|-----|-------------------------------------------------------------------------------------------------------------------|----|
| 1.1 | Tabulation of absolute copy numbers observed at each locus. . . . .                                               | 4  |
| 1.2 | Loss of function mutations. . . . .                                                                               | 6  |
| 1.3 | CNVs potentially producing fusion genes. . . . .                                                                  | 9  |
| 1.4 | PCR primers for VNTR assays. . . . .                                                                              | 12 |
| 1.5 | CNVs with evidence of dispersed duplication. . . . .                                                              | 18 |
| 1.5 | CNVs with evidence of dispersed duplication. . . . .                                                              | 19 |
| 1.5 | CNVs with evidence of dispersed duplication. . . . .                                                              | 20 |
| 1.6 | Ancestral loci of potential polymorphic retrogenes identified from <i>in silico</i> splicing of CGH data. . . . . | 20 |
| 1.7 | PCR primers for assaying four duplicative transpositions. . . . .                                                 | 21 |

## 1 CNV Genotyping

The tables and figures in this section provide supplementary results regarding CNV genotyping.

## 1.1 Absolute copy number / Ancestral state assignment

As described in Supplementary Methods, we fitted a likelihood-based model of absolute copy number using the intensity data and genotype calls derived from the 105k array, and then identified the maximum-likelihood absolute copy number for each CNV (Figure 1.1, Table 1.1). Independent of this, we assayed 8 chimpanzees with the same 105K genotyping array. Following divergence correction of this chimp data we genotyped the chimps using the identical genotyping models and calling parameters that were used for the human data. In the cases that a monomorphic chimp state could be assigned, it was almost always copy number “2” regardless of the alleles segregating in human, suggesting that most copy number variant alleles are the derived allele. Based on the reasonable agreement between the absolute copy number models and chimp genotypes we use the convention that the non 2-copy allele is the derived allele at each locus.

| Model        | Number of Loci | Chimp State            |
|--------------|----------------|------------------------|
| 0, 1         | 14             | 3=0 10=1               |
| 1, 2         | 2221           | 76=1 1777=2            |
| 0, 1, 2      | 1853           | 32=0 173=1 1316=2      |
| 0, 1, 2, > 2 | 32             | 1=0 4=1 12=2 5=3       |
| 1, 2, > 2    | 277            | 33=1 91=2 13=3 4=4     |
| 2, 3         | 339            | 426=2 23=3             |
| 2, 3, > 3    | 664            | 69=2 18=3 59=4 3=5 1=8 |

Table 1.1: **Tabulation of absolute copy numbers observed at each locus.** “Model” indicates the absolute copy number of clusters parameterized by the model. “Number of Loci” refers to the number of CNV loci assigned to each model. “Chimp State” contains the breakdown of copy number seen at monomorphic chimp sites for each model type. The notation is “number of sites = copy number”, so for model 2,3 there were 426 sites in chimp where the estimated ancestral copy number was 2 and 23 sites where it was 3.

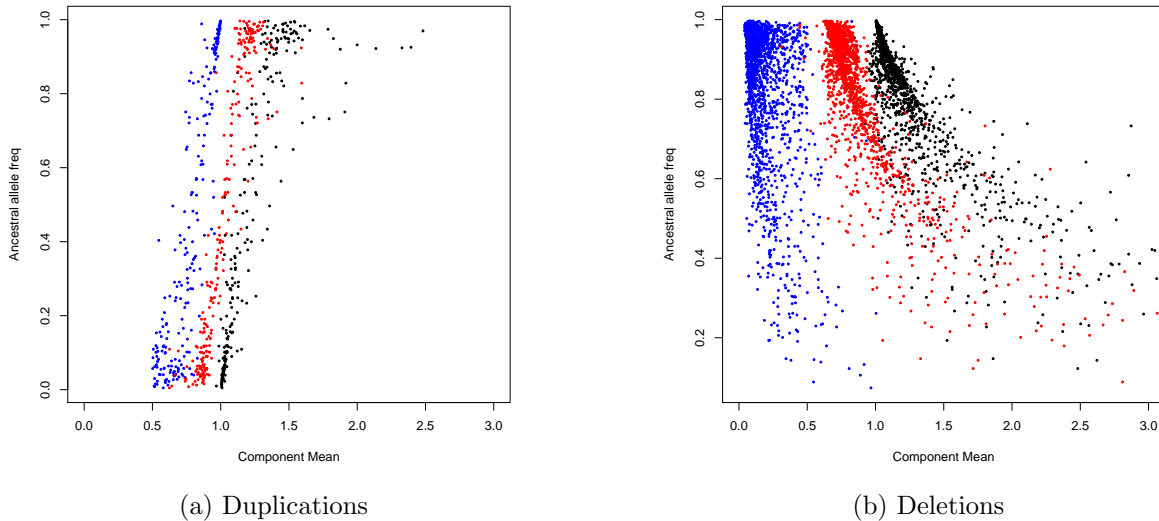

Figure 1.1: **Observed cluster means for 3 component CNVs called as (a) duplications and (b) deletions.** The mean intensity ratio (Cy5/Cy3) for all three clusters at each locus (x-axis) are plotted against the frequency of the ancestral allele at that locus (y-axis). Because the reference DNA is a pool from 10 individuals, the cluster means for each absolute copy number is frequency dependent. These cluster means are colored by their ordered values (blue: lowest copy number component; red, middle; black, highest). These observed results agree quite well with the theoretically expected cluster positions (See Supplementary Methods).

## 2 Genomic Impact

The tables and figures in this section contain supplementary results pertaining to the genomic impact of CNVs. We further characterize the number and nature of functional elements predicted to be affected by CNVs in our map, and test for biases towards/away from various classes of genomic annotations and specific groupings of genes.

| Validated genotyped deletions (N=4,136)                      | # Loci (%)    | # RefSeq Transcripts <sup>1</sup> (%) | # RefSeq genes <sup>2</sup> (%) |
|--------------------------------------------------------------|---------------|---------------------------------------|---------------------------------|
| <b>Whole gene deletions</b>                                  | 79 (1.91%)    | 272 (0.88%)                           | 213 (1.06%)                     |
| <b>Partial gene deletions</b>                                | 1354 (32.74%) | 1658 (5.36%)                          | 1159 (5.75%)                    |
| - Contained in intron                                        | 1142 (27.61%) | 1324 (4.28%)                          | 916 (4.54%)                     |
| - Overlapping exon(s)                                        | 191 (4.62%)   | 295 (0.95%)                           | 212 (1.05%)                     |
| - Full exon (both breakpoints in introns), frameshift        | 35 (0.85%)    | 41 (0.13%)                            | 34 (0.17%)                      |
| - Full exon (both breakpoints in introns), in frame          | 23 (0.56%)    | 38 (0.12%)                            | 22 (0.11%)                      |
| - partial-exon (at least one breakpoint in exon), frameshift | 8 (0.19%)     | 10 (0.03%)                            | 8 (0.04%)                       |
| - partial-exon (at least one breakpoint in exon), in frame   | 11 (0.27%)    | 14 (0.05%)                            | 12 (0.06%)                      |
| - Overlapping stop codon                                     | 54 (1.31%)    | 75 (0.24%)                            | 65 (0.32%)                      |
| - Overlapping promoter                                       | 96 (2.32%)    | 163 (0.53%)                           | 121 (0.60%)                     |
| <b>Intergenic</b>                                            | 2703 (65.35%) | -                                     | -                               |

Table 1.2: **Loss of function mutations.** <sup>1</sup> RefSeq transcripts, N=30,917, <sup>2</sup> RefSeq genes, N=20,174.

| Dataset                               | All Valid CNVEs | All Genot CNVEs | Gen. Dels | Gen. Dups | Gen. Multi | Common CNVEs | Common Dels | Common Dups | Rare CNVEs | Rare Dels | Rare Dups |
|---------------------------------------|-----------------|-----------------|-----------|-----------|------------|--------------|-------------|-------------|------------|-----------|-----------|
| RefSeq genes                          | 0.999           | 0.999           | 0.999     | 0.398     | 0.780      | 0.999        | 0.999       | 0.847       | 0.959      | 0.987     | 0.233     |
| OMIM                                  | 0.999           | 0.996           | 0.997     | 0.669     | 0.897      | 0.756        | 0.802       | 0.474       | 0.998      | 0.999     | 0.505     |
| AD genes                              | 0.955           | 0.971           | 0.920     | 0.786     | 0.836      | 0.326        | 0.333       | 0.683       | 0.896      | 0.918     | 0.676     |
| AR genes                              | 0.996           | 0.924           | 0.887     | 0.743     | 0.961      | 0.999        | 0.995       | 0.999       | 0.860      | 0.955     | 0.362     |
| Disease Dosage Sensitive Genes        | 0.784           | 0.599           | 0.400     | 0.938     | 0.726      | 0.730        | 0.603       | 0.999       | 0.760      | 0.630     | 0.894     |
| CancerGenes                           | 0.999           | 0.999           | 0.998     | 0.932     | 0.879      | 0.987        | 0.966       | 0.999       | 0.989      | 0.994     | 0.835     |
| Pharmacogenetic                       | 0.343           | 0.326           | 0.639     | 0.387     | 0.125      | 0.889        | 0.852       | 0.999       | 0.699      | 0.835     | 0.540     |
| EnhancerElements                      | 0.999           | 0.999           | 0.999     | 0.976     | 0.930      | 0.859        | 0.999       | 0.381       | 0.954      | 0.851     | 0.999     |
| UltraConserved                        | 0.999           | 0.999           | 0.988     | 0.999     | 0.999      | 0.999        | 0.999       | 0.999       | 0.820      | 0.624     | 0.999     |
| miRNAs                                | 0.718           | 0.956           | 0.804     | 0.964     | 0.874      | 0.999        | 0.999       | 0.999       | 0.882      | 0.703     | 0.999     |
| Imprinting Genes                      | 0.415           | 0.888           | 0.952     | 0.710     | 0.453      | 0.999        | 0.999       | 0.999       | 0.740      | 0.999     | 0.311     |
| RecombHotspot                         | 0.860           | 0.043           | 0.001     | 0.824     | 0.993      | 0.607        | 0.459       | 0.864       | 0.001      | 0.001     | 0.262     |
| CpG Islands                           | 0.000           | 0.507           | 0.999     | 0.000     | 0.014      | 0.933        | 0.986       | 0.236       | 0.005      | 0.200     | 0.000     |
| DNaseIhypersensitivity                | 0.132           | 0.745           | 0.999     | 0.000     | 0.007      | 0.963        | 0.995       | 0.038       | 0.006      | 0.030     | 0.013     |
| Promoter.plusminus500                 | 0.000           | 0.005           | 0.824     | 0.000     | 0.000      | 0.787        | 0.972       | 0.031       | 0.003      | 0.080     | 0.001     |
| Stop Codons                           | 0.000           | 0.102           | 0.999     | 0.000     | 0.000      | 0.823        | 0.956       | 0.183       | 0.225      | 0.909     | 0.004     |
| WSSD (inferred read-depth)            | 0.000           | 0.000           | 0.966     | 0.000     | 0.000      | 0.218        | 0.999       | 0.000       | 0.001      | 0.311     | 0.000     |
| GenomicSuperDups (sequence-alignment) | 0.000           | 0.000           | 0.050     | 0.000     | 0.000      | 0.000        | 0.887       | 0.000       | 0.000      | 0.406     | 0.000     |

|  |                                                          |
|--|----------------------------------------------------------|
|  | significant enrichment, after Bonferroni correction      |
|  | significant enrichment, before Bonferroni correction     |
|  | significant impoverishment, after Bonferroni correction  |
|  | significant impoverishment, before Bonferroni correction |

Figure 1.2: **Testing of enrichment/impoverishment of genomic features within CNVs.** Eleven CNV maps (columns) were constructed using subsets of the validated CNVs and each CNV map was intersected with a number of different genomic annotation datasets (rows). Cells contain the proportion of 1000 randomized CNV maps that result in greater annotation overlap than what was observed with the true CNV map. Despite a high level of interdependency between the individual tests, a Bonferroni correction was applied, taking into account that 18 different comparisons were performed with each set of simulated data (corrected p-value = 0.003). 'Gen.' = genotyped; 'Common' = variants  $\geq 10\%$  MAF; 'Rare' = variants  $\leq 1\%$  MAF.

## 2.1 Functional classification of genes intersected by CNV loci

Our analyses reveal that functional categories/biological processes such as cell adhesion activity (categories such as cell adhesion, cell-cell adhesion and homophilic cell adhesion, as well as cell recognition-notably enriched for proteins involved in gamete binding and fusion or fertilization), are found to be significantly enriched in all CNV loci (Figure 1.3). Other functional categories involved in defense and response to external stimulus were also found to be enriched especially in multi-allelic and duplication loci (response to biotic stimulus, response to bacterium, defense to bacterium, antigen processing and presentation of peptide antigen via MHC class II). Genes involved in nervous system development were found to be enriched especially in common loci.

Categories found to be significantly impoverished were all related to regulation of biological or cellular processes as well as primary metabolic processes (cellular metabolic process, macromolecule metabolic processes, primary metabolic processes, regulation of biological processes, RNA metabolic processes, and nucleobase, nucleoside and nucleotide and nucleic acid metabolic process).

Interestingly we found enrichment for genes in cell communication (cell-communication), as well as in signaling (phosphorus metabolic process and regulation of Ras protein signal transduction), opposed to previous results (Redon, et al. 06). These functional categories include members involved in cell-adhesion mediated signaling and G-protein mediated signaling, but also include tyrosine kinases, serine/threonine kinases, and phosphatases, that collectively participate in a variety of physiological and developmental processes such as cell growth, proliferation and differentiation [includes members of the Ras, FGF, EGF, PDGF signaling]. Given that many of these processes are known to be involved in medically relevant conditions, understanding the population genetics of associated-CNV loci is likely important to understand disease.

KEGG pathways found to be significantly enriched in CNVs were metabolism of drugs, toxicity and xenobiotics (metabolism of xenobiotics by cytochrome P450, porphyrin and chlorophyll metabolism, and androgen and estrogen metabolism), and sugar metabolism (pentose and glucuronate interconversions and starch and sucrose metabolism). However, these observations are driven largely by one large gene cluster, the uridine diphosphate (UDP)-glucuronosyltransferase loci, where a few CNVs overlap multiple distinct genes that are functionally related.

| Loci categories        | Index       | Term                                                                                                   | Representation        | List vs. background        | p value        | Adjusted p value (2-tail) <sup>1</sup> |
|------------------------|-------------|--------------------------------------------------------------------------------------------------------|-----------------------|----------------------------|----------------|----------------------------------------|
| <b>Initial finding</b> | <b>GO</b>   | <b>biological process at level 3</b>                                                                   |                       |                            |                |                                        |
| Validated              | 0           | cellular metabolic process (GO 0044237)                                                                | <i>under</i>          | 46.69% 53.31%              | 1.66E-06       | <b>1.26E-04</b>                        |
| Validated              | 0           | cell adhesion (GO 0007155)                                                                             | <i>over</i>           | 61.7% 38.3%                | 6.99E-06       | <b>2.66E-04</b>                        |
| Validated              | 0           | macromolecule metabolic process (GO 0043170)                                                           | <i>under</i>          | 46.48% 53.52%              | 1.87E-05       | <b>4.74E-04</b>                        |
| Validated              | 0           | primary metabolic process (GO 0044238)                                                                 | <i>under</i>          | 47.04% 52.96%              | 2.74E-05       | <b>5.20E-04</b>                        |
| Validated              | 0           | regulation of biological process (GO 0050789)                                                          | <i>under</i>          | 46.48% 53.52%              | 1.52E-03       | <b>2.31E-02</b>                        |
| <i>Validated</i>       | 0           | cell recognition (GO 0008037)                                                                          | <i>over</i>           | 73.49% 26.51%              | 5.05E-03       | <i>6.40E-02</i>                        |
| <i>Validated</i>       | 0           | biosynthetic process (GO 0009058)                                                                      | <i>under</i>          | 43.51% 56.49%              | 7.08E-03       | <i>7.68E-02</i>                        |
| <i>Validated</i>       | 0           | cell communication (GO 0007154)                                                                        | <i>over</i>           | 52.81% 47.19%              | 9.77E-03       | <i>9.28E-02</i>                        |
| Dups, Common           | 0           | antigen processing and presentation (GO 0019882)                                                       | <i>over</i>           | 81.46% 18.54%              | 3.32E-04       | <b>2.53E-02</b>                        |
| <i>Multi</i>           | 0           | response to biotic stimulus (GO 0009607)                                                               | <i>over</i>           | 76.19% 23.81%              | 2.27E-03       | <i>8.36E-02</i>                        |
| <i>Multi</i>           | 0           | establishment of localization (GO 0051234)                                                             | <i>under</i>          | 29.19% 70.81%              | 3.30E-03       | <i>8.36E-02</i>                        |
| <b>Initial finding</b> | <b>GO</b>   | <b>biological process at level 4</b>                                                                   |                       |                            |                |                                        |
| Validated              | 1           | nucleobase, nucleoside, nucleotide and nucleic acid metabolic process (GO 0006139)                     | <i>under</i>          | 42.78% 57.22%              | 7.15E-08       | <b>1.54E-05</b>                        |
| Validated              | 1           | cell-cell adhesion (GO 0016337)                                                                        | <i>over</i>           | 65.98% 34.02%              | 1.20E-04       | <b>1.18E-02</b>                        |
| Validated              | 1           | regulation of metabolic process (GO 0019222)                                                           | <i>under</i>          | 43.88% 56.12%              | 1.64E-04       | <b>1.18E-02</b>                        |
| Validated              | 1           | regulation of cellular process (GO 0050794)                                                            | <i>under</i>          | 46.01% 53.99%              | 8.66E-04       | <b>4.65E-02</b>                        |
| <i>Dels</i>            | 1           | phosphorus metabolic process (GO 0006793)                                                              | <i>over</i>           | 60.34% 39.66%              | 6.92E-04       | <i>7.44E-02</i>                        |
| <i>Dups, Common</i>    | 1           | antigen processing and presentation of peptide or polysaccharide antigen via MHC class II (GO 0002504) | <i>over</i>           | 87.03% 12.97%              | 1.32E-03       | <i>9.47E-02</i>                        |
| <b>Initial finding</b> | <b>GO</b>   | <b>biological process at level 5</b>                                                                   |                       |                            |                |                                        |
| Validated              | 2           | homophilic cell adhesion (GO 0007156)                                                                  | <i>over</i>           | 74.15% 25.85%              | 1.32E-06       | <b>5.58E-04</b>                        |
| Validated              | 2           | RNA metabolic process (GO 0016070)                                                                     | <i>under</i>          | 43.68% 56.32%              | 8.19E-05       | <b>1.73E-02</b>                        |
| <i>Validated</i>       | 2           | regulation of cellular metabolic process (GO 0031323)                                                  | <i>under</i>          | 44.18% 55.82%              | 4.29E-04       | <i>6.04E-02</i>                        |
| <i>Multi</i>           | 2           | response to bacterium (GO 0009617)                                                                     | <i>over</i>           | 90.69% 9.31%               | 2.51E-06       | <b>1.06E-03</b>                        |
| <i>Common</i>          | 2           | nervous system development (GO 0007399)                                                                | <i>over</i>           | 69.01% 30.99%              | 3.95E-04       | <i>8.33E-02</i>                        |
| <b>Initial finding</b> | <b>GO</b>   | <b>biological process at level 6</b>                                                                   |                       |                            |                |                                        |
| <i>Multi</i>           | 3           | defense response to bacterium (GO 0042742)                                                             | <i>over</i>           | 90.69% 9.31%               | 1.06E-05       | <b>6.66E-03</b>                        |
| <b>Initial finding</b> | <b>GO</b>   | <b>biological process at level 8</b>                                                                   |                       |                            |                |                                        |
| <i>Validated</i>       | 5           | regulation of Ras protein signal transduction (GO 0046578)                                             | <i>over</i>           | 69.4% 30.6%                | 1.07E-04       | <i>8.81E-02</i>                        |
| <b>Initial finding</b> | <b>KEGG</b> | <b>pathway</b>                                                                                         | <b>Representation</b> | <b>List vs. background</b> | <b>p value</b> | <b>Adjusted p value (2-tail)</b>       |
| Validated              | 7           | Pentose and glucuronate interconversions (hsa00040)                                                    | <i>over</i>           | 95.49% 4.51%               | 2.69E-07       | <b>3.18E-05</b>                        |
| Validated              | 7           | Starch and sucrose metabolism (hsa00500)                                                               | <i>over</i>           | 92% 8%                     | 3.30E-07       | <b>3.18E-05</b>                        |
| Validated              | 7           | Porphyrin and chlorophyll metabolism (hsa00860)                                                        | <i>over</i>           | 91.37% 8.63%               | 6.55E-06       | <b>4.21E-04</b>                        |
| Validated              | 7           | Metabolism of xenobiotics by cytochrome P450 (hsa00980)                                                | <i>over</i>           | 84.32% 15.68%              | 2.23E-05       | <b>1.08E-03</b>                        |
| Validated              | 7           | Androgen and estrogen metabolism (hsa00150)                                                            | <i>over</i>           | 86.7% 13.3%                | 8.81E-05       | <b>3.40E-03</b>                        |

<sup>1</sup>Statistically significant categories (FDR p <0.05) are highlighted in bold; categories with a 0.1 < FDR p <0.05 are given in italic.

Figure 1.3: **Over- or under-representation of Gene Ontology categories (GO) and KEGG pathways.** This table lists all significant GO categories or KEGG pathways found to be enriched or impoverished for genes intersected by CNV (Supplementary Methods). 'Common' = variants  $\geq 10\%$  MAF.



| Chr | Start     | End       | CNV        | Left Gene (strand) | Right Gene (strand) |
|-----|-----------|-----------|------------|--------------------|---------------------|
| 1   | 19472219  | 19487114  | CNVR99.1   | AKR7L-             | AKR7A3-             |
| 1   | 103905687 | 103962929 | CNVR266.8  | AMY2B+             | AMY2A+              |
| 1   | 110017689 | 110060631 | CNVR299.5  | GSTM2+             | GSTM5+              |
| 1   | 146041404 | 146063219 | CNVR345.1  | NBPF11-            | LOC728912-          |
| 1   | 146841681 | 146862201 | CNVR348.4  | NBPF15+            | NBPF16+             |
| 1   | 151026773 | 151036902 | CNVR360.1  | LCE1E+             | LCE1D+              |
| 1   | 153493683 | 153529298 | CNVR370.1  | SCAMP3-            | PKLR-               |
| 1   | 159748409 | 159912837 | CNVR383.1  | FCGR2A+            | FCGR2B+             |
| 1   | 195147464 | 195181215 | CNVR459.2  | CFHR4+             | CFHR2+              |
| 2   | 86825725  | 87027632  | CNVR859.2  | RMND5A+            | RGPD1+              |
| 3   | 49695755  | 49709630  | CNVR1377.1 | APEH+              | RNF123+             |
| 5   | 732013    | 900681    | CNVR2280.3 | TPPP-              | ZDHH11-             |
| 5   | 140195897 | 140202238 | CNVR2621.1 | PCDHA1-PCDHA7+     | PCDHA8+             |
| 5   | 140203353 | 140218974 | CNVR2622.1 | PCDHA1-PCDHA8+     | PCDHA9+—PCDHA10+    |
| 5   | 140534809 | 140539116 | CNVR2624.1 | PCDHB7+            | PCDHB8+             |
| 5   | 180309761 | 180362669 | CNVR2719.1 | BTNL8+             | BTNL3+              |
| 6   | 32055886  | 32060381  | CNVR2843.4 | STK19+             | C4B+                |
| 6   | 32056216  | 32114549  | CNVR2843.6 | STK19+             | CYP21A2+            |
| 6   | 32058051  | 32114339  | CNVR2843.6 | C4B+               | CYP21A2+            |
| 6   | 32066995  | 32093119  | CNVR2843.3 | C4B+               | C4A+                |
| 7   | 74953470  | 74982353  | CNVR3457.2 | POM121C-           | PMS2L3-             |
| 7   | 75898835  | 75982664  | CNVR3462.1 | ZP3+               | UPK3B+              |
| 7   | 99647313  | 99775283  | CNVR3508.2 | STAG3+             | PILRB+              |
| 10  | 46385159  | 46593846  | CNVR4712.4 | SYT15-             | ANXA8—ANXA8L1-      |
| 11  | 4924207   | 4932830   | CNVR5040.1 | OR51A4-            | OR51A2-             |
| 11  | 71176703  | 71225602  | CNVR5223.1 | FAM86C+            | DEFB108B+           |
| 12  | 10462673  | 10490066  | CNVR5430.1 | KLRC3-             | KLRC1-              |
| 12  | 11396088  | 11435791  | CNVR5435.2 | PRB1-              | PRB2-               |
| 12  | 132227275 | 132289498 | CNVR5791.2 | ZNF10+             | ZNF268+             |
| 14  | 49171648  | 50012277  | CNVR6152.2 | C14orf104-         | MAP4K5-             |
| 16  | 162918    | 167514    | CNVR6569.1 | HBA2+              | HBA1+               |
| 16  | 2589819   | 2676116   | CNVR6602.2 | PDPK1+             | KCTD5+              |
| 16  | 86447257  | 86517872  | CNVR6851.1 | SLC7A5-            | CA5A-               |
| 17  | 24093092  | 24095700  | CNVR7048.1 | NEK8+              | TRAF4+              |
| 17  | 33529260  | 33551942  | CNVR7083.1 | TBC1D3F-           | TBC1D3E—TBC1D3-     |
| 17  | 36636477  | 36649035  | CNVR7095.1 | KRTAP9-2+          | KRTAP9-9+           |
| 17  | 36760531  | 36779150  | CNVR7097.1 | KRT33A-            | KRT33B-             |
| 17  | 41521114  | 41789790  | CNVR7114.3 | KIAA1267-          | ARL17-              |
| 17  | 41758316  | 42139813  | CNVR7114.2 | LRRC37A+           | NSF+                |
| 17  | 41969226  | 42142846  | CNVR7114.4 | LRRC37A2+          | NSF+                |
| 19  | 10350139  | 10366017  | CNVR7534.1 | TYK2-              | CDC37-              |
| 19  | 48393880  | 48454467  | CNVR7658.1 | PSG4-              | PSG9-               |
| 19  | 56823616  | 56840725  | CNVR7702.1 | SIGLEC5-           | SIGLEC14-           |
| 19  | 59417076  | 59437785  | CNVR7721.3 | LILRB3-            | LILRA6-             |
| 19  | 59940398  | 59949330  | CNVR7725.4 | KIR3DP1+           | KIR2DL3+            |
| 19  | 60025725  | 60068860  | CNVR7725.6 | KIR3DL1+           | KIR3DL2+            |
| 19  | 60046589  | 60064493  | CNVR7725.5 | KIR2DS4+           | KIR3DL2+            |
| 21  | 10009191  | 10105624  | CNVR7947.1 | TPTE-              | BAGE4—BAGE-         |
| 22  | 37686073  | 37718472  | CNVR8164.1 | APOBEC3A+          | APOBEC3B+           |
| 22  | 41232271  | 41284710  | CNVR8171.2 | SERHL+             | SERHL2+             |
| 23  | 49030760  | 49129879  | CNVR8331.1 | PPP1R3F+           | GAGE2A/B+—GAGE8+    |
| 23  | 49060021  | 49129879  | CNVR8331.1 | GAGE10+            | GAGE2A/B+—GAGE8+    |
| 23  | 49180859  | 49256599  | CNVR8332.1 | GAGE8+GAGE2A/B     | GAGE1+              |
| 23  | 134676299 | 134718802 | CNVR8449.3 | CT45-1+            | CT45-4+—CT45-3+     |
| 23  | 134760888 | 134796563 | CNVR8449.1 | CT45-4-            | CT45-6-             |
| 23  | 153953046 | 154098786 | CNVR8495.1 | BRCC3+             | VBP1+               |

Table 1.3: CNVs potentially producing fusion genes.

**Validation.** Five candidate gene fusions were selected from the list of candidate gene fusions in the validated CNVs, prioritized by call frequency in the discovery data. These involved the genes *BTNL3/BTNL8*, *LCE1E/LCE1D*, *PCDHB7/8*, *AKR7L/AKR7A3*, *SIGLEC5/14*.

Breakpoints for four of the deletions were cloned by PCR:

- *AKR7L/AKR7A3* deletion: chr1:19486821-19472223, covering from the middle of the first intron of *AKR7L*, to the first intron of *AKR7A3*. Size: 14599bp
- *BTNL8* deletion: chr5:180307813-180363315, covering from fourth intron of *BTNL8*, to the fourth intron of *BTNL3*. Size: 55500bp.
- *LCE* deletion: chr1:151026967-151037452, covering from the 3 UTR of *LCE1E*, to the whole transcribed region of *LCE1D*. Size: 10486bp
- *SIGLEC5* deletion: chr19:56824371-56840789, covering from the third intron of *SIGLEC14*, to the third intron of *SIGLEC5*. Size: 16419bp.

Total RNAs from lymphoblastoid cells from samples predicted to have the fusion transcript (NA10851, NA11993, NA12006, NA18511, NA18523, NA18858) were first reverse transcribed into cDNA, then 3 RACE was used to check the possible fusion transcript. The gene *ACTB* was used as a control in each experiment, as well as a control RNA contained in the RACE kit.

Only RNA for the *BTNL8/BTNL3* fusion can be detected, while amplification for the control gene was detected in each case, suggesting that the experimental protocol should be fine. It appears that these genes are not normally expressed in lymphoblastoid cell lines or that the deletion had abolished the active transcription of the affected genes.

### 3 Mutation Mechanisms

In this section we present supplementary results pertaining to our characterization of CNV mutation mechanisms. Specifically, we describe detailed results of analyses of the relative contribution of different mutation processes, the effect of GC and ascertainment on the patterns of CNV around genes, analyses to detect dispersed duplications and analyses to discover DNA motifs enriched at CNV breakpoints. We also describe validation experiments for some VNTRs and putative dispersed duplications.

### 3.1 VNTRs

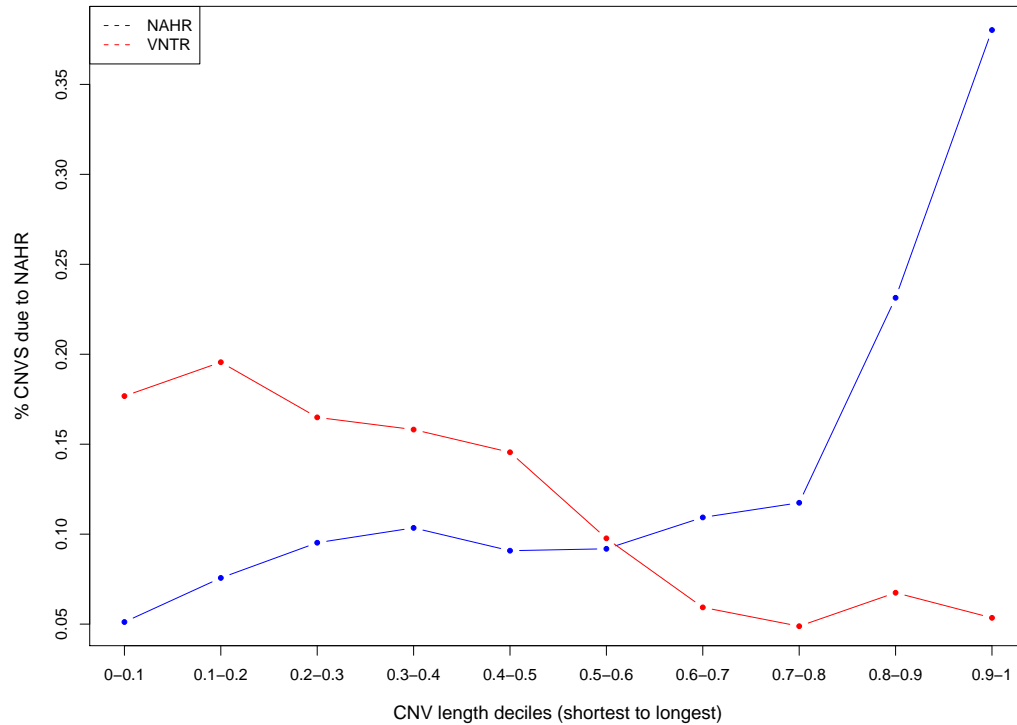

Figure 1.4: **Prevalence of mutation processes depend on size.** The proportion of events corresponding to NAHR and VNTR are plotted as a function of deciles of CNV length.

**PCR Validation.** We attempted PCR on 30 VNTRs shorter than 3kb, using a subset of 14 samples from the discovery panel. The experiments used a touch-down protocol to reduce non-specific amplification and 12 minute extensions. Normally, the size limits of bands should be about 10kb. PCR product was obtained for 29 of 30 reactions but interpretation at some loci was confounded by the presence of multiple bands. For 12 loci only 1 or 2 amplified bands per individual could be seen, and at 11 of these clear polymorphism was observed (primers listed in Table 1.4).

| CNV        | chr | start     | end       | length | orientation | primer Seq                       |
|------------|-----|-----------|-----------|--------|-------------|----------------------------------|
| CNVR3256.1 | 7   | 3969047   | 3970022   | 975    | F           | TCGATGGCTTCATCTACAACGAGAAAAATA   |
|            |     |           |           |        | R           | GAAAGGGCAAACACAAAAGGTATAATTCCA   |
| CNVR2399.1 | 5   | 23938693  | 23941114  | 2421   | F           | TCACAGAACCAATCCCGTATTGTGATTTAC   |
|            |     |           |           |        | R           | AAGGCAAGCAATAAATGCAACTCTGAAAAT   |
| CNVR4095.1 | 8   | 143061501 | 143064148 | 2647   | F           | AGGAGAGGCTAAAAATGCAGGTAAGAATCC   |
|            |     |           |           |        | R           | AGGTAAAGTAACAGCCTCACTCCACAATCC   |
| CNVR7103.1 | 17  | 37743451  | 37744141  | 690    | F           | AACTCCAGAGCAGGAACCTTCTTAGAAAACCA |
|            |     |           |           |        | R           | TATAAAACCCTCAAGAGTCAAGGAGGCAAG   |
| CNVR6900.1 | 17  | 84932     | 85782     | 850    | F           | ACATTTTACAATCCACAACCTGCACCTCATT  |
|            |     |           |           |        | R           | CATTCAAGCCCAGAGGTAGGACATTAGAGT   |
| CNVR3721.3 | 8   | 1824411   | 1825771   | 1360   | F           | TGCACTCTGAGAACTTACTGTAGCGATGAA   |
|            |     |           |           |        | R           | AAGGTCAAACCTCTTTCCTCTGATATGTGC   |
| CNVR8042.1 | 21  | 44653356  | 44655429  | 2073   | F           | TCTTCTTTCAAGAAATGTCTCTCCCTCTCC   |
|            |     |           |           |        | R           | GCAACCAGTTTGGAAAAGGAACAAGTAAAAC  |
| CNVR6556.1 | 15  | 99488278  | 99488817  | 539    | F           | ACCACTGCTTACCCATTATGAGGGCTACTA   |
|            |     |           |           |        | R           | AAACACTGGGGATTACAATTTGACATGAGA   |
| CNVR1808.1 | 4   | 7970790   | 7971720   | 930    | F           | ACCTCTCACTACAACCTCAACACCAGCTCTC  |
|            |     |           |           |        | R           | GATAAGAACTCAATCGGCTCAGAAATGTCA   |
| CNVR1230.1 | 2   | 242158351 | 242159398 | 1047   | F           | AAGCCTCTCTTTTCTCGCTCACGTATAAGA   |
|            |     |           |           |        | R           | CCTCAATCTCTCGAGATGCTAAAGCTAAGG   |
| CNVR8056.1 | 21  | 46142655  | 46143315  | 660    | F           | ACTTTTCAGAGCATGTGTTTCTATCCTCTGG  |
|            |     |           |           |        | R           | CAGGAAACTCTGGAAGAAATGTGTGAAAAA   |
| CNVR3654.2 | 7   | 157569516 | 157571881 | 2365   | F           | ATCCTAAACCTAATTTTTCCCTCACGTGCT   |
|            |     |           |           |        | R           | GATGATCCTGTTTCATTTCGCAGATTCTGTAT |

Table 1.4: PCR primers for VNTR assays.

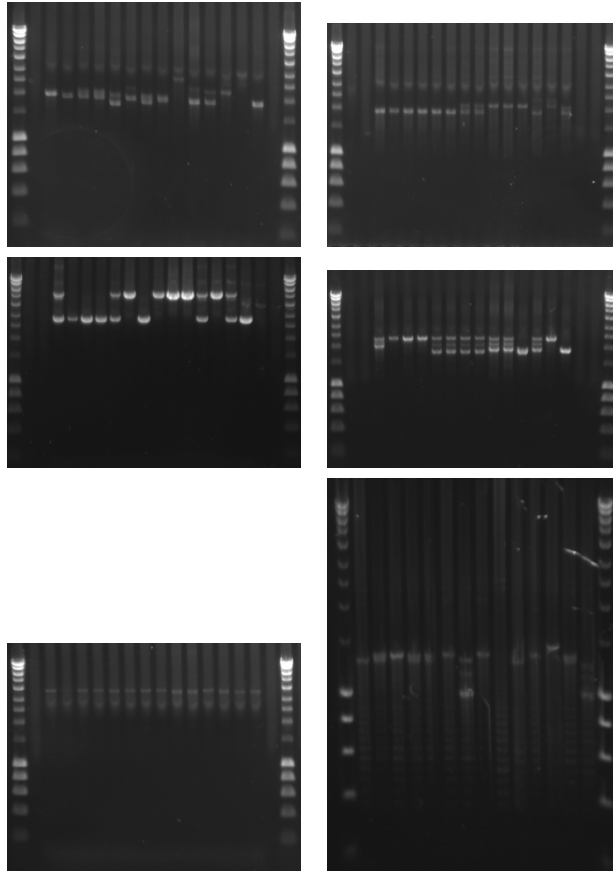

Figure 1.5: **Gels for PCR validation of VNTRs.** Fourteen samples were used for each PCR, they are left-right: NA10851, NA12891, NA12892, NA12878, NA12044, NA11894, NA12287, NA12489, NA19240, NA18517, NA18858, NA19147, NA19190, NA18916. The loci assayed here are, going row-by-row and left to right, starting at the top of the image, Row1: CNVR1230.1 (Left) , CNVR1808.1 (Right); Row 2: CNVR2399.1 (Left), CNVR3256.1 (Right); Row 3: CNVR3654.2 (L), CNVR3721.3 (R); The marker is Bioline HyperLadder I. Bands were sequenced in pGEM-T easy vector.

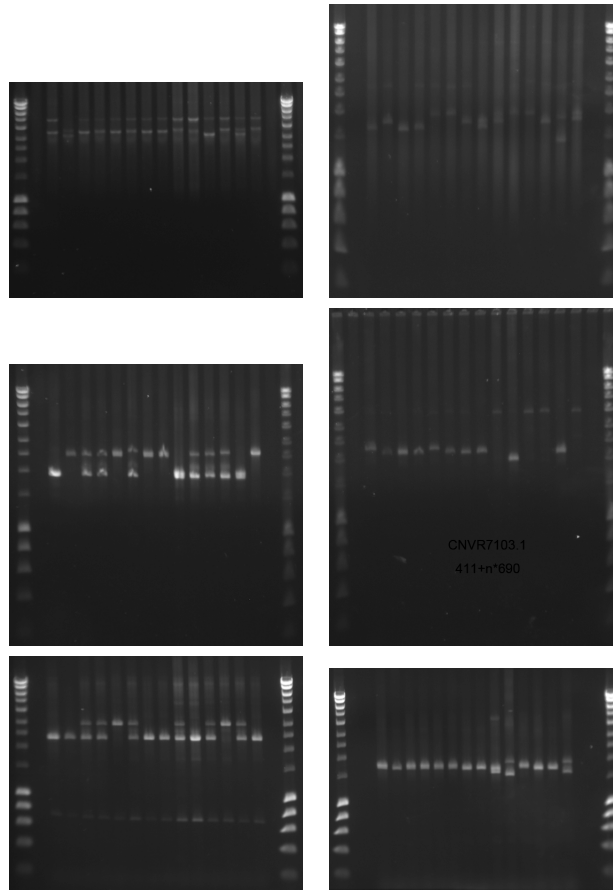

Figure 1.5: **(Continued). Gels for PCR validation of VNTRs.** Fourteen samples were used for each PCR, they are left-right: NA10851, NA12891, NA12892, NA12878, NA12044, NA11894, NA12287, NA12489, NA19240, NA18517, NA18858, NA19147, NA19190, NA18916. The loci assayed here are, going row-by-row and left to right, starting at the top of the image, Row 1: CNVR4095.1 (L), CNVR6556.1 (R); Row 2: CNVR6900.1 (L), CNVR7103.1 (R); Row 3: CNVR8042.1 (L), CNVR8056.1 (R). The marker is Bionline HyperLadder I. Bands were sequenced in pGEM-T easy vector.

## 3.2 Sequence Context

| Functional sequences                | #CNVEs | %CNVEs | #Features | %Features | Total #Features |
|-------------------------------------|--------|--------|-----------|-----------|-----------------|
| RefSeq genes                        | 3340‡  | 37.7   | 2698      | 13.4      | 20174           |
| Promoter region <sup>1</sup>        | 877*   | 10.2   | 1084      | 4.4       | 20174           |
| miRNAs                              | 32     | 0.4    | 18        | 4.7       | 685             |
| CpG islands                         | 775*   | 9      | 257       | 5.2       | 14867           |
| Ultra-conserved elements            | 2      | 0      | 2         | 0.4       | 481             |
| Enhancers                           | 4      | 0      | 3         | 0.5       | 837             |
| OMIM genes                          | 374‡   | 4.3    | 247       | 8.1       | 2052            |
| AR/AD genes                         | 154‡   | 1.8    | 114       | 7.1       | 1613            |
| Dosage sensitive genes <sup>2</sup> | 50‡    | 0.6    | 32        | 22.1      | 145             |
| Pharmaco-genes                      | 45*    | 0.5    | 29        | 24.2      | 186             |
| Imprinted genes                     | 12     | 0.1    | 8         | 20.3      | 59              |
| Cancer genes                        | 54‡    | 0.6    | 43        | 14.1      | 384             |

<sup>1</sup> promoter region was defined as the region within 500 bp upstream and downstream from a given gene transcription start site (TSS). <sup>2</sup> Baylor's Agilent 105K array disease associated dosage sensitive genes. Statistical significance for the enrichment or paucity of functional sequences intersecting CNVEs was assessed by randomly permuting the genomic location of autosomal CNVEs (Supplementary Methods).

\* Significant (P<0.05) enrichment

‡ Significant (P<0.05) paucity

Figure 1.6: Functional sequences within validated CNVs.

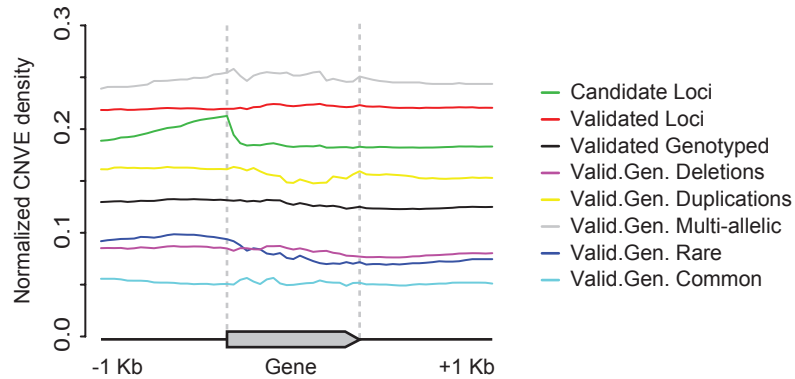

Figure 1.7: **Effect of GC and ascertainment on gene overlap analyses.** RefSeq genes and 1000 bp of 3' and 5' intergenic flanking regions were each divided into 20 bins, and the average number of CNVs overlapping each bin is shown for different CNV subsets. In the initial analysis (“Candidate loci”) we found a modest enrichment in the density of CNVs at gene promoters. During validation we noticed that high-GC CNVs were enriched for false positives; as a result our validation criteria requires an average GC-content < 65%. This filtering removes the 5' peak in CNV density near genes. Notes: Genes transcribed in opposite directions were first analyzed separately, and the density values estimated for each bin were then summed across all (plus and minus strand) genes and divided by the number of genes intersected by CNVs in each subset. Candidate Loci.= all variants detected in the discovery phase; Valid.= validated variants; Valid.Gen. = validated high-quality genotyped loci.

We used the program nestedMICA to identify the 20 most over-represented motifs of 6-13bp in size (See Supplementary Methods for full details). NestedMICA returns each motif as a position weight matrix (PWM), and we plot these PWMs as Shannon Logos here (Figure 1.8). PWMs are ways of representing degeneracy in a motif; instead of representing a consensus sequence the PWM is a  $4 \times n$  probability matrix where each column sums to one. Each column in the matrix correspond to a position in the motif, and is represented in a logo as a stack of the 4 DNA bases. At each position in the logo, each base is scaled by its probability of being observed at that position, and the total stack size is scaled by its information content. These logos were plotted with the R package *seqLogo*, written by Oliver Bembom.



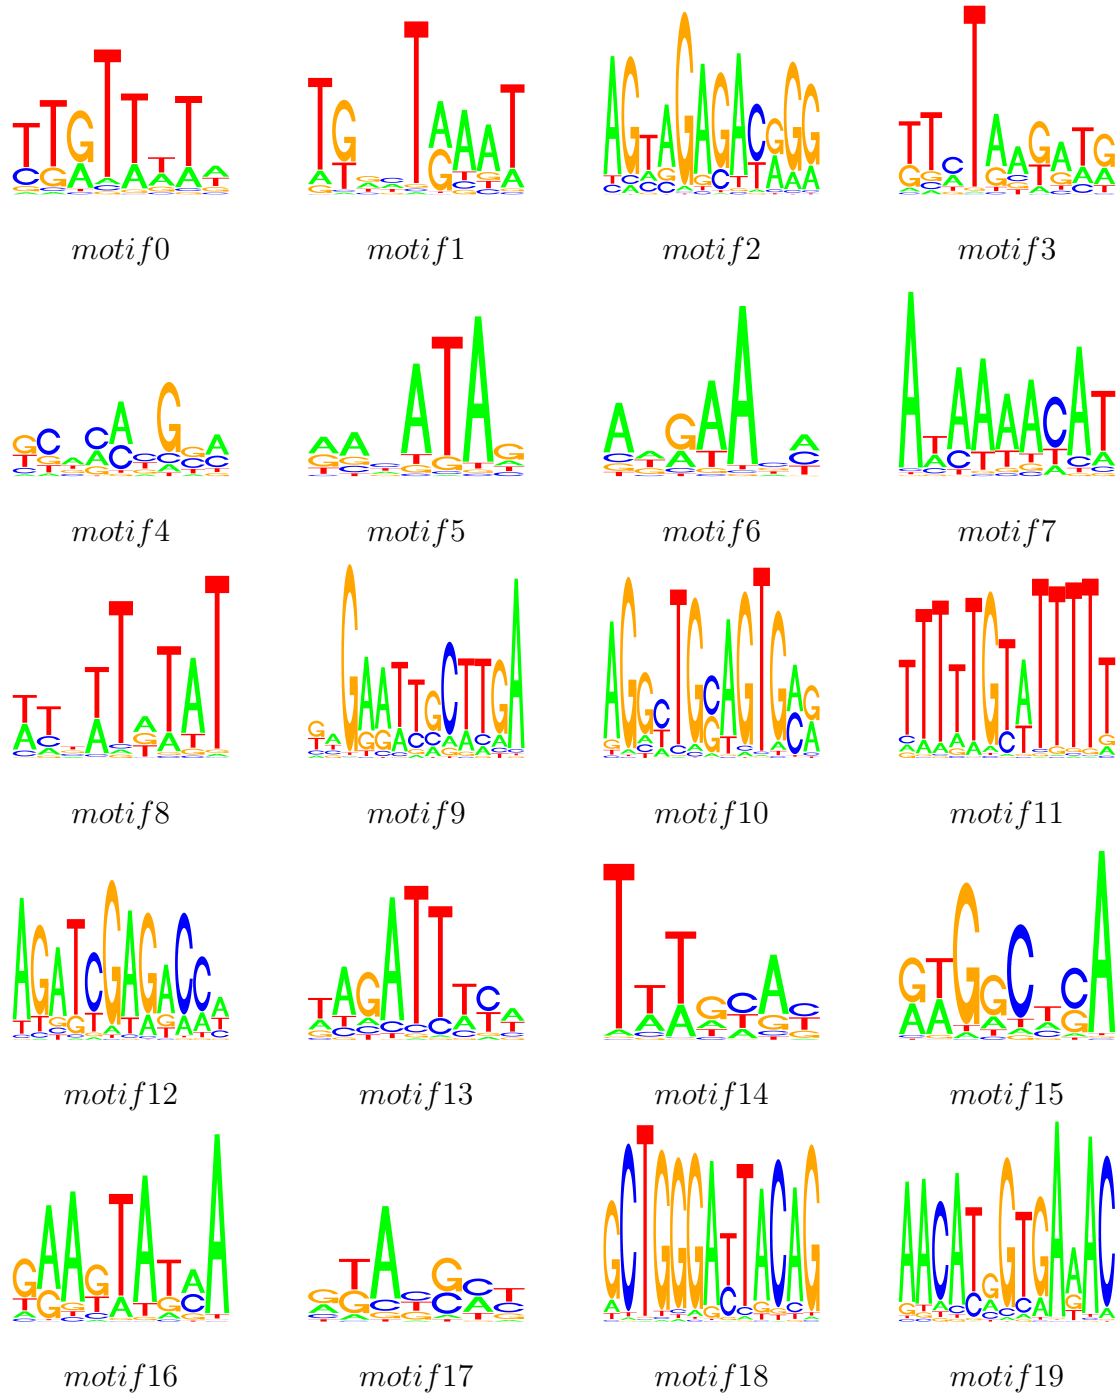

Figure 1.8: Shannon Logos of 20 motifs identified by nestedMICA.

### 3.3 Dispersed Duplications

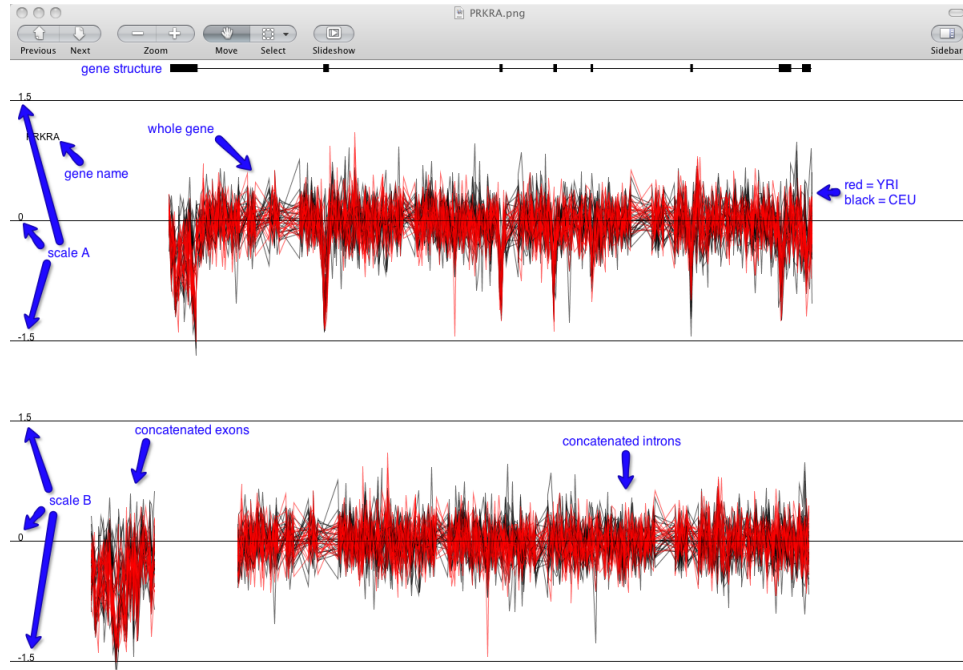

Figure 1.9: **Signal of polymorphic retroposition at the gene PRKRA from *in silico* splicing.** The figure is split into three sections: at the very top is the gene model for PRKRA; in the middle the 42M log<sub>2</sub> ratios for all probes spanning the gene are plotted separately for each of the 40 discovery samples; at the bottom these same data are parsed into exonic probes (left) and intronic probes (right). In this example there appears to be a duplicative transposition of PRKRA in just the reference individual, which is apparent as a trend for log<sub>2</sub> ratios < 0 at exonic but not intronic probes.

| Name       | Chr | Start     | New Chr | New Start | Type  | Genes    | Code |
|------------|-----|-----------|---------|-----------|-------|----------|------|
| Affy6_26   | 6   | 49539524  | 3       | 1364580   | Dups  | CENPQ:4  | L    |
| CNVR1.1    | 1   | 499       | 15      | 100263879 |       | OR4F5:1  | D    |
| CNVR1040.1 | 2   | 161843446 | 4       | 49206896  |       | 0        | D    |
| CNVR1065.1 | 2   | 179004449 | 6       | 32544476  | Dups  | PRKRA:1  | L    |
| CNVR1328.1 | 3   | 26407277  | 1       | 189850097 | Multi | 0        | L    |
| CNVR1345.1 | 3   | 34224641  | 15      | 42839948  | Dups  | 0        | L    |
| CNVR1372.1 | 3   | 46758249  | 20      | 16689497  | Dups  | TESSP5:1 | L    |
| CNVR1508.1 | 3   | 121780988 | 6       | 142289366 |       | 0        | S    |
| CNVR1532.3 | 3   | 129861994 | 2       | 168565491 | Multi | 0        | L    |
| CNVR1663.1 | 3   | 188066795 | 20      | 3961316   |       | 0        | S    |
| CNVR1770.1 | 4   | 3437802   | 11      | 62808519  | Dups  | DOK7:0   | L    |
| CNVR1778.1 | 4   | 4618969   | 5       | 130360762 |       | 0        | S    |
| CNVR1831.1 | 4   | 15215299  | 13      | 39522931  | Dups  | FBXL5:1  | L    |
| CNVR1832.1 | 4   | 15236048  | 13      | 39522931  | Dups  | FBXL5:1  | L    |

Table 1.5: **CNVs with evidence of dispersed duplication.** Type: deletion/duplication/multiallelic, only coded for genotyped loci. Code: "L", interchromosomal LD; "D", overlapping inter-chromosomal segmental duplication; "C", validated germline event from Cancer Genome Project; "S", sequence underlying CNV shows poly-A tail and target site duplications. See Methods for full details.

| Name        | Chr | Start     | New Chr | New Start | Type  | Genes                        | Code |
|-------------|-----|-----------|---------|-----------|-------|------------------------------|------|
| CNVR2.2     | 1   | 340394    | 15      | 100268630 |       | OR4F16:1                     | D    |
| CNVR2151.1  | 4   | 166377398 | 11      | 57882483  | Dups  | KLHL2:0                      | L    |
| CNVR2479.1  | 5   | 61273372  | 18      | 6019122   | Dups  | 0                            | L    |
| CNVR2485.1  | 5   | 65063884  | 1       | 13047215  |       | NLN:0                        | S    |
| CNVR2526.1  | 5   | 90660057  | 6       | 136903092 | Multi | 0                            | L    |
| CNVR2542.1  | 5   | 99541856  | 21      | 42761422  | Multi | 0                            | L    |
| CNVR2562.1  | 5   | 110311433 | 6       | 136645520 |       | 0                            | S    |
| CNVR2717.1  | 5   | 180108619 | 9       | 8307236   | Dups  | 0                            | L    |
| CNVR2862.1  | 6   | 36748154  | 4       | 17188213  |       | 0                            | S    |
| CNVR3159.1  | 6   | 166919026 | 15      | 81450426  |       | RPS6KA2:0                    | S    |
| CNVR318.1   | 1   | 119943910 | 13      | 58670160  | Multi | 0                            | L    |
| CNVR3398.3  | 7   | 55757645  | 14      | 69712132  | Dups  | 0                            | L    |
| CNVR3533.1  | 7   | 111019447 | 5       | 115579000 | Multi | 0                            | L    |
| CNVR3598.2  | 7   | 143539578 | 6       | 114333506 | Multi | 0                            | L    |
| CNVR3618.4  | 7   | 151532774 | 21      | 10105718  | Multi | MLL3:2                       | L    |
| CNVR3751.1  | 8   | 4014857   | 2       | 64381478  | Multi | CSMD1:0                      | L    |
| CNVR4280.1  | 9   | 41552631  | 10      | 47993093  | Multi | ZNF658B:1                    | L    |
| CNVR4339.2  | 9   | 74995705  | 8       | 39465563  |       | 0                            | S    |
| CNVR4684.1  | 10  | 32903336  | 8       | 78655139  | Dups  | CCDC7:1/C10orf68:0           | L    |
| CNVR4685.1  | 10  | 33229325  | 19      | 14592686  | Dups  | ITGB1:1                      | LD   |
| CNVR4841.2  | 10  | 89138473  | 1       | 105062330 | Multi | 0                            | L    |
| CNVR4841.3  | 10  | 89139568  | 7       | 13621304  | Multi | MINPP1:3                     | L    |
| CNVR5131.1  | 11  | 34128668  | 6       | 1051881   | Dups  | ABTB2:1                      | L    |
| CNVR5186.1  | 11  | 57923640  | 4       | 166377389 |       | 0                            | S    |
| CNVR5545.1  | 12  | 54066882  | 2       | 178636416 | Dups  | 0                            | L    |
| CNVR5712.1  | 12  | 123062059 | 2       | 3898560   | Dups  | ZNF664:1                     | LC   |
| CNVR5889.1  | 13  | 56701502  | 16      | 16584576  | Multi | 0                            | L    |
| CNVR6073.1  | 14  | 19594433  | 20      | 51835473  | Dups  | OR4L1:1                      | L    |
| CNVR6172.1  | 14  | 64084537  | 3       | 2709841   | Dups  | C14orf50:3                   | L    |
| CNVR6233.1  | 14  | 92782265  | 1       | 9039330   | Dups  | BTBD7:1                      | L    |
| CNVR6266.1  | 14  | 102020212 | 4       | 130514072 | Multi | KIAA0329:0                   | L    |
| CNVR6330.9  | 15  | 26710413  | 2       | 172121715 | Multi | 0                            | L    |
| CNVR6366.1  | 15  | 41780690  | 6       | 40482266  | Multi | 0                            | L    |
| CNVR6564.2  | 15  | 100209456 | 6       | 170775689 |       | OR4F4:1                      | D    |
| CNVR6608.1  | 16  | 3622891   | 6       | 47107965  | Dups  | 0                            | L    |
| CNVR6808.1  | 16  | 80395173  | 12      | 50843083  | Dups  | PLCG2:0                      | L    |
| CNVR6855.1  | 16  | 86722175  | 13      | 102017780 | Dups  | 0                            | L    |
| CNVR6927.1  | 17  | 924032    | 12      | 124353045 | Dups  | ABR:0                        | L    |
| CNVR7043.1  | 17  | 22560736  | 17      | 16871486  |       | 0                            | D    |
| CNVR7070.1  | 17  | 29087983  | 1       | 88752190  | Dups  | 0                            | LC   |
| CNVR7131.1  | 17  | 47252967  | 18      | 2737840   | Multi | CA10:0                       | L    |
| CNVR7273.1  | 18  | 14789518  | 3       | 44405336  | Multi | 0                            | L    |
| CNVR7280.1  | 18  | 22001856  | 5       | 79957900  |       | PSMA8:0                      | S    |
| CNVR73.8    | 1   | 13081767  | 20      | 12316097  | Dups  | 0                            | L    |
| CNVR7358.1  | 18  | 60186868  | 14      | 27933537  | Dups  | 0                            | L    |
| CNVR756.1   | 2   | 37811582  | 4       | 49314563  | Multi | 0                            | L    |
| CNVR7588.2  | 19  | 24343380  | 17      | 31426031  | Dups  | 0                            | L    |
| CNVR7629.1  | 19  | 41449253  | 4       | 132863778 |       | 0                            | D    |
| CNVR7658.2  | 19  | 48000706  | 13      | 98502630  | Multi | PSG1:5/PSG6:6/PSG7:6/PSG11:5 | L    |
| CNVR7702.1  | 19  | 56823616  | 1       | 14998430  | Multi | SIGLEC5:4/SIGLEC14:7         | L    |
| CNVR7821.2  | 20  | 25679048  | 7       | 57673452  |       | 0                            | D    |
| CNVR7992.1  | 21  | 31354018  | 15      | 23168062  |       | 0                            | S    |
| CNVR8072.6  | 22  | 14969740  | 11      | 76210801  | Multi | 0                            | L    |
| CNVR8085.1  | 22  | 16871523  | 17      | 22289266  | Dups  | MICAL3:0                     | LD   |
| CNVR8103.16 | 22  | 20783598  | 2       | 158609008 | Multi | 0                            | L    |
| CNVR8108.1  | 22  | 22101503  | 7       | 1885258   | Dups  | 0                            | L    |
| CNVR8136.1  | 22  | 31257932  | 6       | 24780180  | Dups  | SYN3:0                       | LC   |
| CNVR8221.1  | 22  | 49414530  | 4       | 22188023  | Multi | 0                            | L    |
| CNVR861.3   | 2   | 87510594  | 18      | 42476587  | Multi | 0                            | L    |

Table 1.5: **CNVs with evidence of dispersed duplication.** Type: deletion/duplication/multiallelic, only coded for genotyped loci. Code: "L", interchromosomal LD; "D", overlapping inter-chromosomal segmental duplication; "C", validated germline event from Cancer Genome Project; "S", sequence underlying CNV shows poly-A tail and target site duplications. See Methods for full details.

| Name      | Chr | Start     | New Chr | New Start | Type  | Genes | Code |
|-----------|-----|-----------|---------|-----------|-------|-------|------|
| CNVR927.1 | 2   | 111724832 | 4       | 65475118  | Dups  | 0     | L    |
| CNVR979.1 | 2   | 129958916 | 12      | 11577532  | Multi | 0     | L    |

Table 1.5: **CNVs with evidence of dispersed duplication.** Type: deletion/duplication/multiallelic, only coded for genotyped loci. Code: "L", interchromosomal LD; "D", overlapping inter-chromosomal segmental duplication; "C", validated germline event from Cancer Genome Project; "S", sequence underlying CNV shows poly-A tail and target site duplications. See Methods for full details.

| Gene    | Chr | Start     | End       | CNV   | T-tests | Nexon | Nintron |
|---------|-----|-----------|-----------|-------|---------|-------|---------|
| ABTB2   | 11  | 34129111  | 34335378  | 0.026 | 18      | 85    | 3020    |
| AHNAK   | 11  | 61957592  | 62070908  | 0.000 | 8       | 351   | 1130    |
| AP2B1   | 17  | 30938395  | 31077549  | 0.000 | 6       | 118   | 1899    |
| API5    | 11  | 43290081  | 43322658  | 0.000 | 10      | 75    | 438     |
| CCDC50  | 3   | 192529568 | 192599152 | 0.099 | 9       | 165   | 1030    |
| DST     | 6   | 56430744  | 56615653  | 0.000 | 8       | 555   | 2456    |
| EIF4B   | 12  | 51686329  | 51722260  | 0.000 | 6       | 77    | 371     |
| EXPH5   | 11  | 107881368 | 107969584 | 0.000 | 7       | 178   | 1060    |
| FAM3C   | 7   | 120776141 | 120823658 | 0.000 | 25      | 49    | 757     |
| FAM45A  | 10  | 120853601 | 120887213 | 0.040 | 31      | 45    | 289     |
| FAM45B  | 10  | 120853619 | 120886505 | 0.019 | 11      | 31    | 289     |
| FAM91A1 | 8   | 124850063 | 124896871 | 0.000 | 9       | 111   | 671     |
| MLL2    | 12  | 47699025  | 47735374  | 0.000 | 6       | 368   | 256     |
| MTHFD1  | 14  | 63924512  | 63996478  | 0.000 | 10      | 75    | 862     |
| MUC16   | 19  | 8820520   | 8953018   | 0.000 | 8       | 826   | 1207    |
| MUC5AC  | 11  | 1132474   | 1245302   | 0.081 | 6       | 383   | 1261    |
| MYST2   | 17  | 45221070  | 45261457  | 0.000 | 11      | 65    | 509     |
| NAB1    | 2   | 191222093 | 191265737 | 0.000 | 8       | 86    | 657     |
| NUS1    | 6   | 118103310 | 118138579 | 0.000 | 29      | 90    | 455     |
| PAK2    | 3   | 197951125 | 198043915 | 0.076 | 13      | 112   | 1070    |
| PCDHA10 | 5   | 140215818 | 140372113 | 0.021 | 16      | 99    | 2237    |
| PCDHA9  | 5   | 140207541 | 140372113 | 0.070 | 43      | 155   | 2317    |
| PCLO    | 7   | 82221257  | 82630133  | 0.000 | 24      | 415   | 6175    |
| PRKI    | 3   | 171422914 | 171506464 | 0.000 | 31      | 100   | 902     |
| PRKRA   | 2   | 179004388 | 179024204 | 0.040 | 31      | 40    | 272     |
| RAB6A   | 11  | 73064331  | 73149849  | 0.064 | 10      | 67    | 894     |
| RBM39   | 20  | 33754945  | 33793607  | 0.000 | 6       | 60    | 441     |
| SALL1   | 16  | 49727387  | 49742684  | 0.000 | 10      | 99    | 176     |
| SRRM2   | 16  | 2742331   | 2761414   | 0.000 | 6       | 171   | 168     |
| TDG     | 12  | 102883723 | 102906785 | 0.000 | 11      | 65    | 245     |
| TERF1   | 8   | 74083651  | 74122541  | 0.000 | 11      | 55    | 533     |
| TTC3    | 21  | 37367441  | 37497278  | 0.000 | 34      | 185   | 1737    |
| TTN     | 2   | 179098964 | 179380395 | 0.037 | 8       | 2244  | 2646    |
| TYRO3   | 15  | 39638524  | 39658818  | 0.000 | 31      | 76    | 235     |
| USP10   | 16  | 83291056  | 83371028  | 0.034 | 21      | 65    | 1151    |
| WASF2   | 1   | 27604713  | 27689256  | 0.000 | 27      | 78    | 919     |
| ZFHX4   | 8   | 77756070  | 77942076  | 0.000 | 9       | 251   | 2950    |
| ZNF219  | 14  | 20628045  | 20642703  | 0.000 | 6       | 68    | 194     |
| ZNF664  | 12  | 123023623 | 123065922 | 0.091 | 40      | 91    | 636     |

Table 1.6: **Ancestral loci of potential polymorphic retrogenes identified from *in silico* splicing of CGH data.** T-tests: number of significant t-tests. CNV: proportion of gene spanned by 42M CNVs. Nexon, Nintron: number of exonic, intronic probes.

**PCR validation of retroposed genes.** PCR assays were designed for four putative retrotransposed sequences using a three primer design: each assay consists of a duplication-specific primer, a primer specific to the non-duplication allele, and a common primer that

works for both alleles (Table 1.7). In this way the genotype of each sample can be read directly off of the gel by considering band sizes and counts.

| Locus                         | CNVR4685.1                         | CNVR7070.1                            | CNVR5712.1                          | CNVR8136.1                        |
|-------------------------------|------------------------------------|---------------------------------------|-------------------------------------|-----------------------------------|
| Ancestral Chromosome          | 10                                 | 17                                    | 12                                  | 22                                |
| Location                      | 33224858-3324595100                | 29087983-29088776                     | 123062509-123065927                 | 31257893-31258560                 |
| Target Chromosome             | 19                                 | 1                                     | 2                                   | 6                                 |
| Location                      | 14593345-14595100                  | Around 88745413                       | Around 3909526                      | Around 24791967                   |
| Insertion-specific Primers    | 5'-GAGATTGCACC<br>ACTGTATTCTAGC-3' | 5'-TGAACCAGGA<br>GTAAAACAGGC-3'       | 5'-CCCTATGGTG<br>TATGTGCAGC-3'      | 5'-TTGCCAGGT<br>TGGTTCTGAT-3'     |
| Primers                       | 5'-GGAGTTTGCTAA<br>ATTTGAAAAGGA-3' | 5'-GGTTTAAATCTCAA<br>TCTAGTTCAGTGC-3' | 5'-TCGAGCTTTAAA<br>GTCCATAATTG-3'   | 5'-CAAGCCAGGT<br>GGACACAGTA-3'    |
| Expected Size of Product      | 342bp                              | N/A                                   | N/A                                 | N/A                               |
| No-insertion-specific Primers | 5'-GAGATTGCACCA<br>CTGTATTCTAGC-3' | 5'-TGAACCAGGAG<br>TAAAACAGGC-3'       | 5'-CCCTATGGTGTA<br>TGTGCAGC-3'      | 5'-TTGCCAAGGT<br>TGGTTCTGAT-3'    |
| Primers                       | 5'-TGGCTTTTTGAATA<br>AATGACAGAA-3' | 5'-GGCTTGTAATTT<br>TTCTGGTACAT-3'     | 5'-GGCTATGATATA<br>CCAGCCTAAGACA-3' | 5'-TATGAAACCCC<br>CTAAACGTCTTA-3' |
| Expected Size of Product      | 277bp                              | 370bp                                 | 745bp                               | 437bp                             |

Table 1.7: PCR primers for assaying four duplicative transpositions.

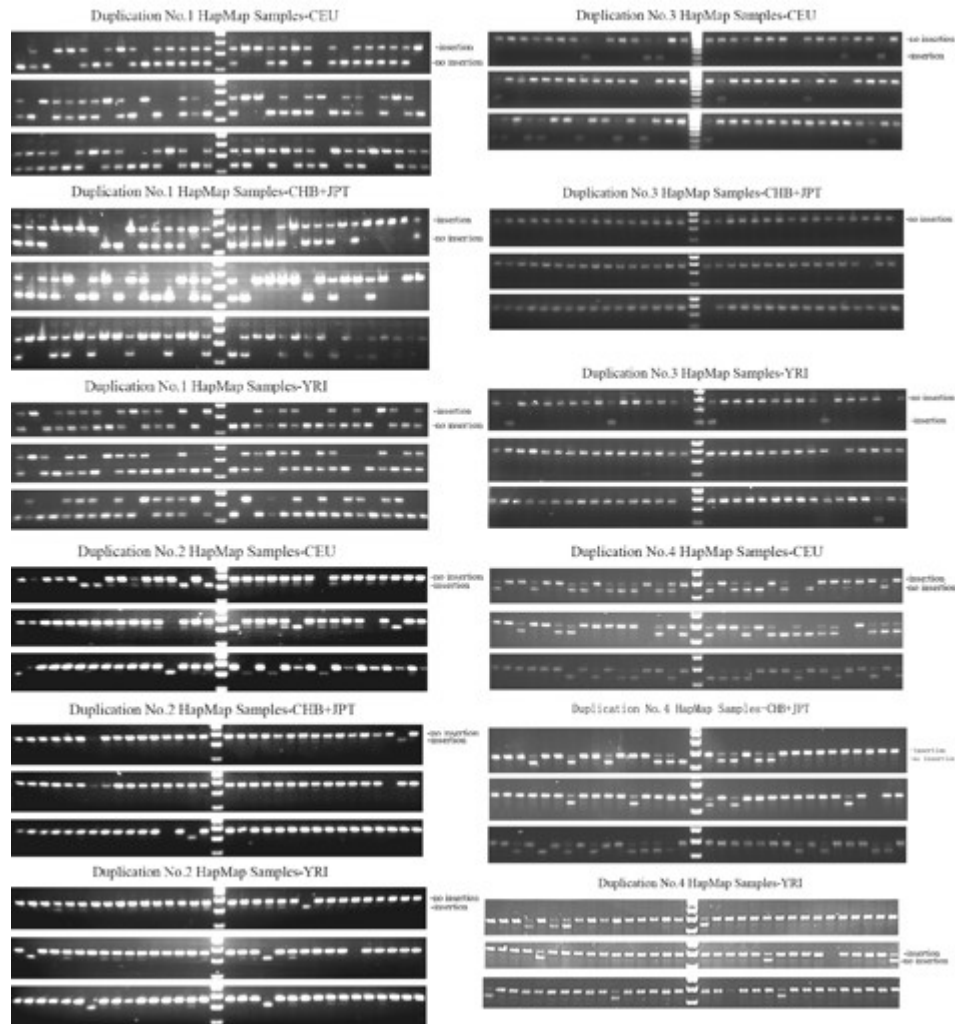

Figure 1.10: **PCR** results for four dispersed duplications on HapMap samples. Duplication 1: CNVR4685.1; Duplication 2: CNVR7070.1; Duplication 3: CNVR5712.1; Duplication 4: CNVR8136.1.

## 4 Population Genetics Analyses

### 4.1 Selection analyses

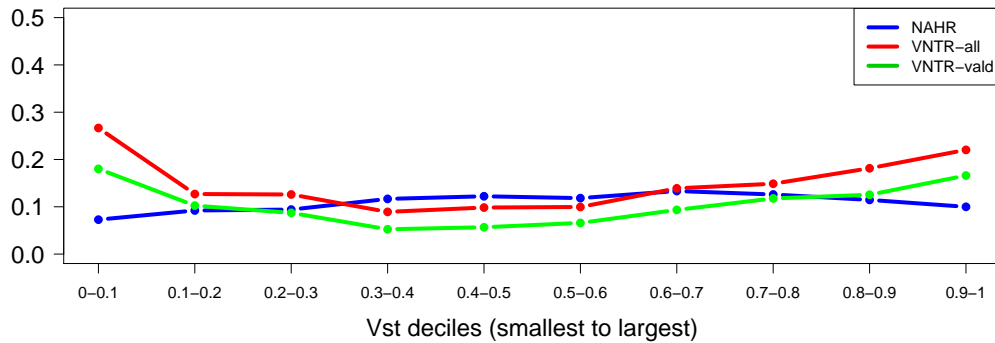

Figure 1.11: **Population differentiation as a function of mutation mechanism.** CNVs were subdivided by likely mutation process (NAHR and VNTR) and the proportion of events falling into each process was tabulated within each decile of  $V_{st}$ . We examined two groupings of VNTR: all VNTRs discovered to be polymorphic with the discovery array (VNTR-all), and the subset of those validated by 105k array (VNTR-vald). There was a significant difference in the proportion of CNVs formed by VNTR-all and NAHR in the top and bottom decile ( $p < 10^{-5}$  by permutation).

## 4.2 LD analyses

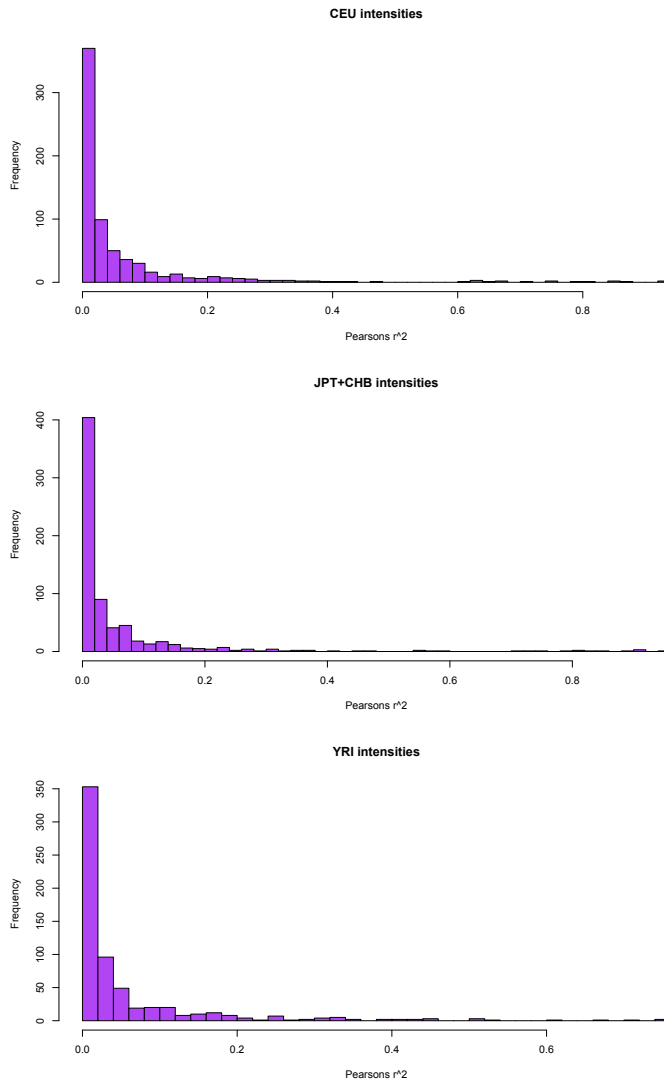

Figure 1.12: **Distribution of squared Pearson correlation between CNV intensities and GWAS hit SNP genotypes.** We employed two strategies for investigating the patterns of linkage disequilibrium between CNVs and GWAS hit-snps. Bi-allelic CNVs that could be reliably genotyped were phased into HapMap haplotypes and then subjected to conventional  $r^2$  calculations. For all other validated CNVs we calculated pairwise Pearson correlations between raw (non-integer) copy number values and GWAS hit SNP genotypes. The distribution of these correlations is plotted here, separately for each HapMap population.



## A WTCCC Authors

**WTCCC Management Committee:** Peter Donnelly (Chair)<sup>1</sup>, Panos Deloukas<sup>2</sup>, Audrey Duncanson<sup>3</sup>, Matthew E Hurles<sup>2</sup>, Dominic P Kwiatkowski<sup>1,2</sup>, Mark I McCarthy<sup>1,4</sup>, Willem H Ouwehand<sup>5,6</sup>, Miles Parkes<sup>7</sup>, Nazneen Rahman<sup>8</sup>, Nilesh J Samani<sup>9,10</sup>, John A Todd<sup>11</sup>

**WTCCC CNV Committee:** Nicholas Craddock<sup>12</sup> (co-chair), Matthew E Hurles<sup>2</sup> (co-chair), Chris Barnes<sup>2</sup>, Niall Cardin<sup>13</sup>, Donald F Conrad<sup>2</sup>, Peter Donnelly<sup>1</sup>, Eleni Giannoulatou<sup>13</sup>, Chris Holmes<sup>13</sup>, Jonathan L Marchini<sup>13</sup>, Richard Pearson<sup>1</sup>, Vincent Plagnol<sup>11</sup>, Samuel Robson<sup>2</sup>, Nilesh J Samani<sup>9,10</sup>, Kathy Stirrups<sup>2</sup>, Martin B Tobin<sup>14</sup>, Damjan Vukcevic<sup>1</sup>, Louise Wain<sup>14</sup>, Chris Yau<sup>13</sup>.

**Autoimmune Thyroid Disease:** Oliver J Brand<sup>15</sup>, Jayne A Franklyn<sup>15,16</sup>, Matthew J Simmonds<sup>15</sup>, Stephen CL Gough<sup>15,16</sup>.

**Ankylosing Spondylitis:** David M Evans<sup>17</sup>, Millicent Stone<sup>18,19</sup>, B Paul Wordsworth<sup>20</sup>, Matthew A Brown<sup>20,21</sup>.

**Breast Cancer:** Jaswinder Bull<sup>8</sup>, Darshna Dudakia<sup>8</sup>, Bernadette Ebbs<sup>8</sup>, Diana Eccles<sup>22</sup>, Anna Elliot<sup>8</sup>, Polly Gibbs<sup>8</sup>, Anita Hall<sup>8</sup>, Sarah Hines<sup>8</sup>, Debbie Hughes<sup>8</sup>, David Pernet<sup>8</sup>, Anthony Renwick<sup>8</sup>, Richard Scott<sup>8</sup>, Sheila Seal<sup>8</sup>, Katarina Spanova<sup>8</sup>, Clare Turnbull<sup>8</sup>, Margaret Warren-Perry<sup>8</sup>, Michael R Stratton<sup>2,8</sup>, Nazneen Rahman<sup>8</sup>.

**Bipolar Depression:** Gerome Breen<sup>23,24</sup>, Sian Caesar<sup>25</sup>, Anne Farmer<sup>24</sup>, I Nicol Ferrier<sup>26</sup>, Liz Forty<sup>27</sup>, Katherine Gordon-Smith<sup>25,27</sup>, Elaine Green<sup>27</sup>, Detelina Grozeva<sup>27</sup>, Ian R Jones<sup>27</sup>, Lisa A Jones<sup>25</sup>, George Kirov<sup>27</sup>, Peter McGuffin<sup>24</sup>, Michael C O'Donovan<sup>27</sup>, Michael J Owen<sup>27</sup>, Ellie Russell<sup>27</sup>, David St Clair<sup>23</sup>, Allan H Young<sup>26,28</sup>, Nicholas Craddock<sup>12,27</sup>.

**Coronary Artery Disease:** Stephen G Ball<sup>29</sup>, Anthony J Balmforth<sup>29</sup>, Peter S Braund<sup>9</sup>, Paul R Burton<sup>14</sup>, Suzanne Rafelt<sup>9</sup>, John R Thompson<sup>14</sup>, Alistair S Hall<sup>29</sup>, Nilesh J Samani<sup>9,10</sup>.

**Crohns Disease:** Tariq Ahmad<sup>30</sup>, Katarzyna Blaszczyk<sup>31</sup>, Francesca Bredin<sup>7</sup>, Hazel E Drummond<sup>32</sup>, Alistair Forbes<sup>33</sup>, Derek P Jewell<sup>34</sup>, Charlie Lees<sup>32</sup>, James Lee<sup>7</sup>, John Mansfield<sup>35</sup>, Dunecan C O Massey<sup>7</sup>, Alex Mentzer<sup>36</sup>, Elaine R Nimmo<sup>32</sup>, Natalie J Prescott<sup>31</sup>, Jeremy D Sanderson<sup>36</sup>, Jack Satsangi<sup>32</sup>, Christopher G Mathew<sup>31</sup>, Miles Parkes<sup>7</sup>.

**Hypertension:** Morris J Brown<sup>37</sup>, David G Clayton<sup>11</sup>, John Connell<sup>38</sup>, Anna Dominiczak<sup>38</sup>, Martin Farrall<sup>39</sup>, Philip Howard<sup>40</sup>, Toby Johnson<sup>40</sup>, G Mark Lathrop<sup>41</sup>, Kate L Lee<sup>40</sup>, Abiodun Onipinla<sup>40</sup>, Nilesh J Samani<sup>9,10</sup>, Sue Shaw-Hawkins<sup>40</sup>, John Webster<sup>42</sup>, Patricia B Munroe<sup>40</sup>, Mark Caulfield<sup>40</sup>

**Multiple Sclerosis:** Alastair Compston<sup>43</sup>, Stephen J Sawcer<sup>43</sup>.

**Rheumatoid Arthritis:** Anne Barton<sup>44</sup>, John Bowes<sup>44</sup>, Ian N Bruce<sup>44</sup>, Paul Emery<sup>45</sup>, Steve Eyre<sup>44</sup>, Edward Flynn<sup>44</sup>, Paul Gilbert<sup>44</sup>, Pile Harrison<sup>46</sup>, Anne Hinks<sup>44</sup>, Lynne Hocking<sup>47</sup>, John D Isaacs<sup>48</sup>, Paul Martin<sup>44</sup>, Ann E Morgan<sup>49</sup>, David M Reid<sup>47</sup>, Deborah PM Symmons<sup>44</sup>, Sophia Steer<sup>50</sup>, Wendy Thomson<sup>44</sup>, Anthony G Wilson<sup>51</sup>, Paul Wordsworth<sup>20,46</sup>, Jane Worthington<sup>44</sup>xs

**Type 1 Diabetes:** Oliver S Burren<sup>11</sup>, Jason D Cooper<sup>11</sup>, Kate Downes<sup>11</sup>, Matt Hardy<sup>11</sup>, Joanne MM Howson<sup>11</sup>, Meeta Maisuria-Armer<sup>11</sup>, Nigel R Ovington<sup>11</sup>, Vincent Plagnol<sup>11</sup>, Helen Schuilenburg<sup>11</sup>, Debbie J Smyth<sup>11</sup>, Helen E Stevens<sup>11</sup>, Neil M Walker<sup>11</sup>, Chris Wallace<sup>11</sup>, Matthew Woodburn<sup>11</sup>, David G Clayton<sup>11</sup>, John A Todd<sup>11</sup>.

**Type 2 Diabetes:** Amanda J Bennett<sup>4</sup>, Rachel M Freathy<sup>52</sup>, Chris J Groves<sup>4</sup>, Nee-lam Hassanali<sup>4</sup>, Graham A Hitman<sup>53</sup>, Hana Lango-Allen<sup>52</sup>, Cecilia M Lindgren<sup>1</sup>, Andrew P Morris<sup>1</sup>, Kirstie Parnell<sup>52</sup>, John RB Perry<sup>52</sup>, Inga Prokopenko<sup>1</sup>, Nigel W Rayner<sup>1</sup>, Neil Robertson<sup>1</sup>, Mary Travers<sup>1</sup>, Mark Walker<sup>54</sup>, Michael N Weedon<sup>52</sup>, Eleftheria Zeggini<sup>1,2</sup>, Andrew T Hattersley<sup>52,55</sup>, Timothy M Frayling<sup>52</sup>, Mark I McCarthy<sup>1,4</sup>.

**1958 Birth Cohort Controls:** Wendy L McArdle<sup>56</sup>, Susan M Ring<sup>56</sup>, David P Strachan<sup>57</sup>.

**UK Blood Service Controls:** Anthony Attwood<sup>2,5,6</sup>, Jennifer D Jolley<sup>5,6</sup>, Jennifer G Sambrook<sup>5,6</sup>, Jonathan Stephens<sup>5,6</sup>, Nicholas A Watkins<sup>5,6</sup>, Willem H Ouwehand<sup>2,5,6</sup>.

**Sample processing, genotyping and sequencing:** Hazel Arbury<sup>2</sup>, Sanjeev Bhaskar<sup>2</sup>, John Burton<sup>2</sup>, Chris M Clee<sup>2</sup>, Alison J Coffey<sup>2</sup>, Andrew Dunham<sup>2</sup>, Sarah Edkins<sup>2</sup>, Emma Gray<sup>2</sup>, Rhian Gwilliam<sup>2</sup>, Eleanor Howard<sup>2</sup>, Sarah Hunt<sup>2</sup>, Kirsten E McLay<sup>2</sup>, Michael L Mimmack<sup>2</sup>, Kimmo Palin<sup>2</sup>, Michael A Quail<sup>2</sup>, Carol E Scott<sup>2</sup>, Elilan Somaskantharajah<sup>2</sup>, Ins Barroso<sup>2</sup>, Aarno Palotie<sup>2</sup>, Panos Deloukas<sup>2</sup>.

**CNV Analysis:** Jan Aerts<sup>2</sup>, Chris Barnes<sup>2</sup>, Niall Cardin<sup>13</sup>, Donald F Conrad<sup>2</sup>, Peter Donnelly<sup>1</sup>, Eleni Giannoulatou<sup>13</sup>, Naomi Hammond<sup>2</sup>, Chris Holmes<sup>12</sup>, Kevin Lewis<sup>2</sup>, Jonathan L Marchini<sup>13</sup>, Richard Pearson<sup>1</sup>, Vincent Plagnol<sup>11</sup>, Samuel Robson<sup>2</sup>, Kathy Stirrups<sup>2</sup>, Martin B Tobin<sup>14</sup>, Damjan Vukcevic<sup>1</sup>, Louise Wain<sup>14</sup>, Chris Yau<sup>13</sup>, Matthew E Hurles<sup>2</sup>

**Fine-mapping and sequence analysis:** Adam Auton<sup>13</sup>, Jake Byrnes<sup>1</sup>, Julian Maller<sup>1</sup>, Andrew P Morris<sup>1</sup>, Simon Myers<sup>13</sup>, Gil McVean<sup>13</sup>, Peter Donnelly<sup>1</sup>

**WTCCC Principal Investigators:** Matthew A Brown<sup>20,21</sup>, Paul R Burton<sup>14</sup>, Mark Caulfield<sup>40</sup>, Alastair Compston<sup>43</sup>, Nicholas Craddock<sup>12</sup>, Panos Deloukas<sup>2</sup>, Martin Farrall<sup>39</sup>, Stephen CL Gough<sup>15,16</sup>, Alistair S Hall<sup>29</sup>, Andrew T Hattersley<sup>52,55</sup>, Adrian VS Hill<sup>1</sup>, Matthew E Hurles<sup>2</sup>, Dominic P Kwiatkowski<sup>1,2</sup>, Mark I McCarthy<sup>1,4</sup>, Christopher G Mathew<sup>31</sup>, Willem H Ouwehand<sup>5,6</sup>, Miles Parkes<sup>7</sup>, Marcus Pembrey<sup>58</sup>, Nazneen Rahman<sup>8</sup>, Nilesh J Samani<sup>9,10</sup>, Jack Satsangi<sup>32</sup>, Michael R Stratton<sup>2</sup>, John A Todd<sup>11</sup>, Jane Worthington<sup>44</sup>, Peter Donnelly<sup>1</sup>.

- <sup>1</sup>The Wellcome Trust Centre for Human Genetics, University of Oxford, Roosevelt Drive, Oxford OX3 7BN, UK.
- <sup>2</sup>The Wellcome Trust Sanger Institute, Wellcome Trust Genome Campus, Hinxton, Cambridge, CB10 1SA UK.
- <sup>3</sup>The Wellcome Trust, Gibbs Building, 215 Euston Road, London NW1 2BE, UK.
- <sup>4</sup>Oxford Centre for Diabetes, Endocrinology and Medicine, University of Oxford, Churchill Hospital, Oxford OX3 7LJ, UK.
- <sup>5</sup>Department of Haematology, University of Cambridge, Long Road, Cambridge, CB2 0PT, UK
- <sup>6</sup>National Health Service Blood and Transplant, Cambridge Centre, Long Road, Cambridge CB2 2PT, UK.
- <sup>7</sup>IBD Genetics Research Group, Addenbrooke's Hospital, Cambridge, CB2 0QQ, UK
- <sup>8</sup>Section of Cancer Genetics, Institute of Cancer Research, 15 Cotswold Road, Sutton SM2 5NG, UK.
- <sup>9</sup>Department of Cardiovascular Sciences, University of Leicester, Glenfield Hospital, Groby Road, Leicester LE3 9QP, UK.
- <sup>10</sup>Leicester NIHR Biomedical Research Unit in Cardiovascular Disease, Glenfield Hospital, Leicester, LE3 9QP, UK
- <sup>11</sup>Juvenile Diabetes Research Foundation/Wellcome Trust Diabetes and Inflammation Laboratory, Department of Medical Genetics, Cambridge Institute for Medical Research, University of Cambridge, Wellcome Trust/MRC Building, Cambridge CB2 0XY, UK.
- <sup>12</sup>Department of Psychological Medicine, Henry Wellcome Building, School of Medicine, Cardiff University, Heath Park, Cardiff CF14 4XN, UK.
- <sup>13</sup>Department of Statistics, University of Oxford, 1 South Parks Road, Oxford, OX1 3TG
- <sup>14</sup>Department of Health Sciences and Genetics, University of Leicester, 217 Adrian Building, University Road, Leicester, LE1 7RH, UK
- <sup>15</sup>Centre for Endocrinology, Diabetes and Metabolism, Institute of Biomedical Research, University of Birmingham, Birmingham, B15 2TT, UK
- <sup>16</sup>University Hospital Birmingham NHS Foundation Trust, Birmingham, B15 2TT, UK
- <sup>17</sup>MRC Centre for Causal Analyses in Translational Epidemiology, Department of Social Medicine, University of Bristol, Bristol, BS8 2BN, UK
- <sup>18</sup>University of Toronto, St. Michael's Hospital, 30 Bond Street, Toronto Ontario Canada M5B 1W8
- <sup>19</sup>University of Bath, Claverdon, Norwood House, Room 5.11a Bath Somerset BA2 7AY UK
- <sup>20</sup>Nuffield Department of Orthopaedics, Rheumatology and Musculoskeletal Sciences, Nuffield Orthopaedic Centre, University of Oxford, Windmill Road, Headington, Oxford, OX3 7LD, UK
- <sup>21</sup>Diamantina Institute of Cancer, Immunology and Metabolic Medicine, Princess Alexandra Hospital, University of Queensland, Ipswich Road, Woolloongabba, Brisbane, Queensland, 4102, Australia
- <sup>22</sup>Academic Unit of Genetic Medicine, University of Southampton, Southampton, UK
- <sup>23</sup>University of Aberdeen, Institute of Medical Sciences, Foresterhill, Aberdeen AB25 2ZD, UK
- <sup>24</sup>SGDP, The Institute of Psychiatry, King's College London, De Crespigny Park, Denmark Hill, London SE5 8AF, UK
- <sup>25</sup>Department of Psychiatry, University of Birmingham, National Centre for Mental Health, 25 Vincent Drive, Birmingham, B15 2FG, UK
- <sup>26</sup>School of Neurology, Neurobiology and Psychiatry, Royal Victoria Infirmary, Queen Victoria Road, Newcastle upon Tyne, NE1 4LP, UK
- <sup>27</sup>MRC Centre for Neuropsychiatric Genetics and Genomics, School of Medicine, Cardiff University, Heath Park, Cardiff, CF14 4XN, UK
- <sup>28</sup>UBC Institute of Mental Health, 430-5950 University Boulevard Vancouver, British Columbia, Canada V6T 1Z3.
- <sup>29</sup>Multidisciplinary Cardiovascular Research Centre (MCRC), Leeds Institute of Genetics, Health and Therapeutics (LIGHT), University of Leeds, Leeds, LS2 9JT, UK
- <sup>30</sup>Genetics of Complex Traits, Peninsula College of Medicine and Dentistry University of Exeter, EX1 2LU
- <sup>31</sup>Department of Medical and Molecular Genetics, Kings College London School of Medicine, 8th Floor Guys Tower, Guys Hospital, London, SE1 9RT, UK
- <sup>32</sup>Gastrointestinal Unit, Division of Medical Sciences, School of Molecular and Clinical Medicine, University of Edinburgh, Western General Hospital, Edinburgh EH4 2XU, UK
- <sup>33</sup>Institute for Digestive Diseases, University College London Hospitals Trust, London NW1 2BU, UK
- <sup>34</sup>Gastroenterology Unit, Radcliffe Infirmary, University of Oxford, Oxford, OX2 6HE, UK
- <sup>35</sup>Department of Gastroenterology & Hepatology, University of Newcastle upon Tyne Royal Victoria Infirmary, Newcastle upon Tyne NE1 4LP, UK
- <sup>36</sup>Division of Nutritional Sciences, King's College London School of Biomedical and Health Sciences, London SE1 9NH, UK
- <sup>37</sup>Clinical Pharmacology Unit, University of Cambridge, Addenbrookes Hospital, Hills Road, Cambridge CB2 2QQ, UK;
- <sup>38</sup>BHF Glasgow Cardiovascular Research Centre, University of Glasgow, 126 University Place, Glasgow, G12 8TA, UK;
- <sup>39</sup>Cardiovascular Medicine, University of Oxford, Wellcome Trust Centre for Human Genetics, Roosevelt Drive, Oxford OX3 7BN, UK;
- <sup>40</sup>Clinical Pharmacology and Barts and The London Genome Centre, William Harvey Research Institute, Barts and The London School of Medicine and Dentistry, Queen Mary University of London, Charterhouse Square, London EC1M 6BQ, UK;
- <sup>41</sup>Centre National de Genotypage, 2, Rue Gaston Cremieux, Evry, Paris 91057, France;
- <sup>42</sup>Medicine and Therapeutics, Aberdeen Royal Infirmary, Foresterhill, Aberdeen, Grampian AB9 2ZB, UK;
- <sup>43</sup>Department of Clinical Neurosciences, University of Cambridge, Addenbrooke's Hospital, Hills Road, Cambridge, CB2 2QQ, UK
- <sup>44</sup>arc Epidemiology Unit, Stopford Building, University of Manchester, Oxford Road, Manchester, M13 9PT, UK
- <sup>45</sup>Academic Unit of Musculoskeletal Disease, University of Leeds, Chapel Allerton Hospital, Leeds, West Yorkshire LS7 4SA, UK
- <sup>46</sup>University of Oxford, Institute of Musculoskeletal Sciences, Botnar Research Centre, Oxford, OX3 7LD, UK
- <sup>47</sup>Bone Research Group, Department of Medicine and Therapeutics, University of Aberdeen, Aberdeen, AB25 2ZD, UK
- <sup>48</sup>Institute of Cellular Medicine, Musculoskeletal Research Group, 4th Floor, Catherine Cookson Building, The Medical School, Framlington Place, Newcastle upon Tyne, NE2 4HH, UK
- <sup>49</sup>NIHR-Leeds Musculoskeletal Biomedical Research Unit, University of Leeds, Chapel Allerton Hospital, Leeds, West Yorkshire LS7 4SA, UK
- <sup>50</sup>Clinical and Academic Rheumatology, Kings College Hospital National Health Service Foundation Trust, Denmark Hill, London SE5 9RS, UK
- <sup>51</sup>School of Medicine and Biomedical Sciences, University of Sheffield, Sheffield, S10 2JF, UK
- <sup>52</sup>Genetics of Complex Traits, Peninsula College of Medicine and Dentistry, University of Exeter, Magdalen Road, Exeter, EX1 2LU, UK
- <sup>53</sup>Centre for Diabetes and Metabolic Medicine, Barts and The London, Royal London Hospital, Whitechapel, London, E1 1BB UK
- <sup>54</sup>Diabetes Research Group, School of Clinical Medical Sciences, Newcastle University, Framlington Place, Newcastle upon Tyne NE2 4HH, UK
- <sup>55</sup>Genetics of Diabetes, Peninsula College of Medicine and Dentistry, University of Exeter, Barrack Road, Exeter, EX2 5DW, UK
- <sup>56</sup>ALSPAC Laboratory, Department of Social Medicine, University of Bristol, BS8 2BN, UK.
- <sup>57</sup>Division of Community Health Sciences, St George's, University of London, London SW17 0RE, UK
- <sup>58</sup>Avon Longitudinal Study of Parents and Children, University of Bristol, 24 Tyndall Avenue, Bristol BS8 1TQ, UK.
